# Supplementary material for: Targeting fibrinogen-like protein 1 enhances immunotherapy in hepatocellular carcinoma
Source: PubMed Central journal article supplement (PMC10145938; doi:10.1172/jci164528), 2023-05-01
Supplement: jci-133-164528-s019.pdf [file jci-133-164528-s019.pdf]

## Supplemental Figures

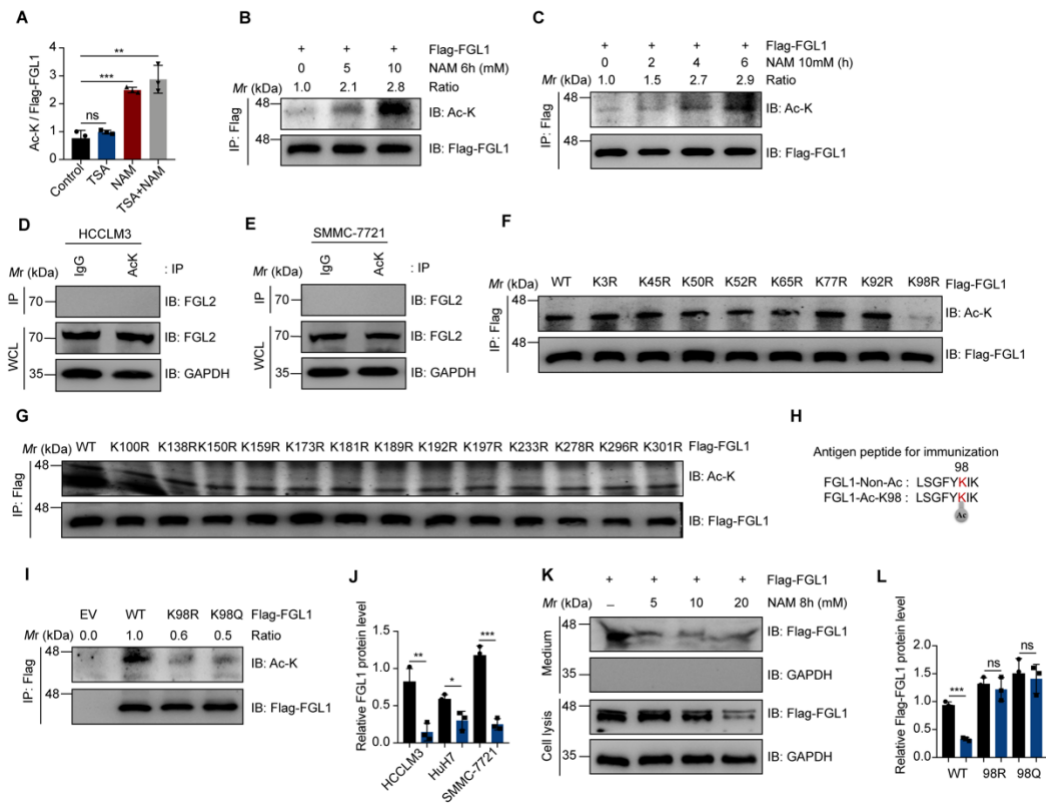

**Supplemental Figure 1. FGL1 is acetylated at Lys 98 and acetylation promotes its degradation.**

(A) Statistical analysis of immunoblots in Figure 1C determined by Student's t test. ns, no significance, \*  $p < 0.05$ , \*\*  $p < 0.01$ , \*\*\*  $p < 0.001$ . (B) IB analysis of FGL1 acetylation level in HEK293T cells stably expressed Flag-FGL1 and treated with increasing concentrations of NAM (0 to 10 mM) for 6h. (C) IB analysis of FGL1 acetylation level in HEK293T cells stably expressed Flag-FGL1 and treated with 10 mM NAM for different time as indicated. (D) IB analysis of whole-cell lysates (WCL) and anti-acetylated lysine immunoprecipitates (IPs) derived from HCCLM3 cells. IgG was used as a negative control. (E) IB analysis of whole-cell lysates (WCL) and anti-acetylated lysine immunoprecipitates (IPs) derived from SMMC-7721 cells. IgG was used as a negative control. (F) IB analysis of FGL1 acetylation derived from HEK293T cells transfected with Flag-FGL1 WT or different mutant forms. (G) IB analysis of FGL1 acetylation derived from HEK293T cells transfected with Flag-FGL1 WT or different mutant forms. (H) A schematic diagram of the FGL1 Lys 98 non-acetylated and acetylated peptides used for immunization

to generate the anti-acetyl-K98 FGL1 antibody. **(I)** K98R and K98Q mutations decrease FGL1 acetylation.

**(J)** Statistical analysis of immunoblots in Figure 1H determined by Student's t test. ns, no significance,

\*  $p < 0.05$ , \*\*  $p < 0.01$ , \*\*\*  $p < 0.001$ . **(K)** IB analysis of FGL1 protein level in HEK293T cells stably

expressed Flag-FGL1 and treated with increasing concentrations of NAM (0 to 10 mM) for 8h. **(L)**

Statistical analysis of immunoblots in Figure 1K determined by Student's t test. ns, no significance, \*  $p$

$< 0.05$ , \*\*  $p < 0.01$ , \*\*\*  $p < 0.001$ .

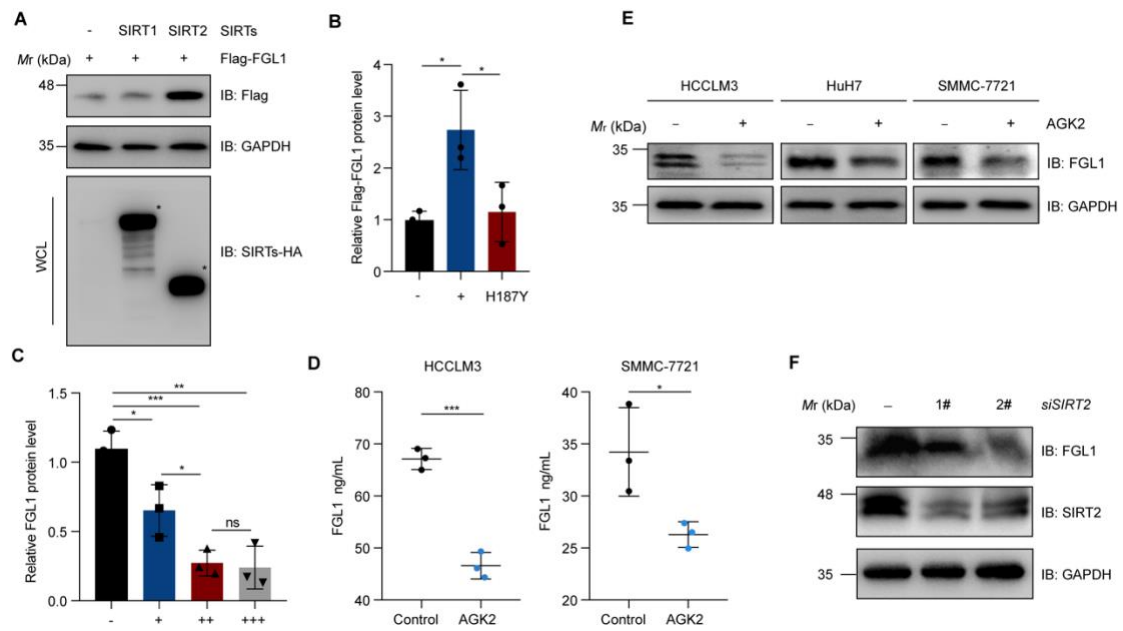

**Supplemental Figure 2. Inhibition of SIRT2 reduces FGL1 protein level.** (A) IB analysis of FGL1 level in HEK293T cells stably expressed Flag-FGL1 and transfected with SIRT1 or SIRT2. (B) Statistical analysis of immunoblots in Figure 2I determined by Student's t test. ns, no significance, \*  $p < 0.05$ , \*\*  $p < 0.01$ , \*\*\*  $p < 0.001$ . (C) Statistical analysis of immunoblots in Figure 2K determined by Student's t test. ns, no significance, \*  $p < 0.05$ , \*\*  $p < 0.01$ , \*\*\*  $p < 0.001$ . (D) The amounts of soluble FGL1 from different HCC cell lines treated with or without AGK2 (20  $\mu$ M,8h) were assessed by Enzyme-linked immunoassay (ELISA) (n = 3) with Student's t test. ns, no significance, \*  $p < 0.05$ , \*\*  $p < 0.01$ , \*\*\*  $p < 0.001$ . (E) IB analysis of endogenous FGL1 level in multiple HCC cell lines treated with AGK2 (20  $\mu$ M,8h). (F) IB analysis of endogenous FGL1 level in control and SIRT2 knockdown HCCM3 cells.

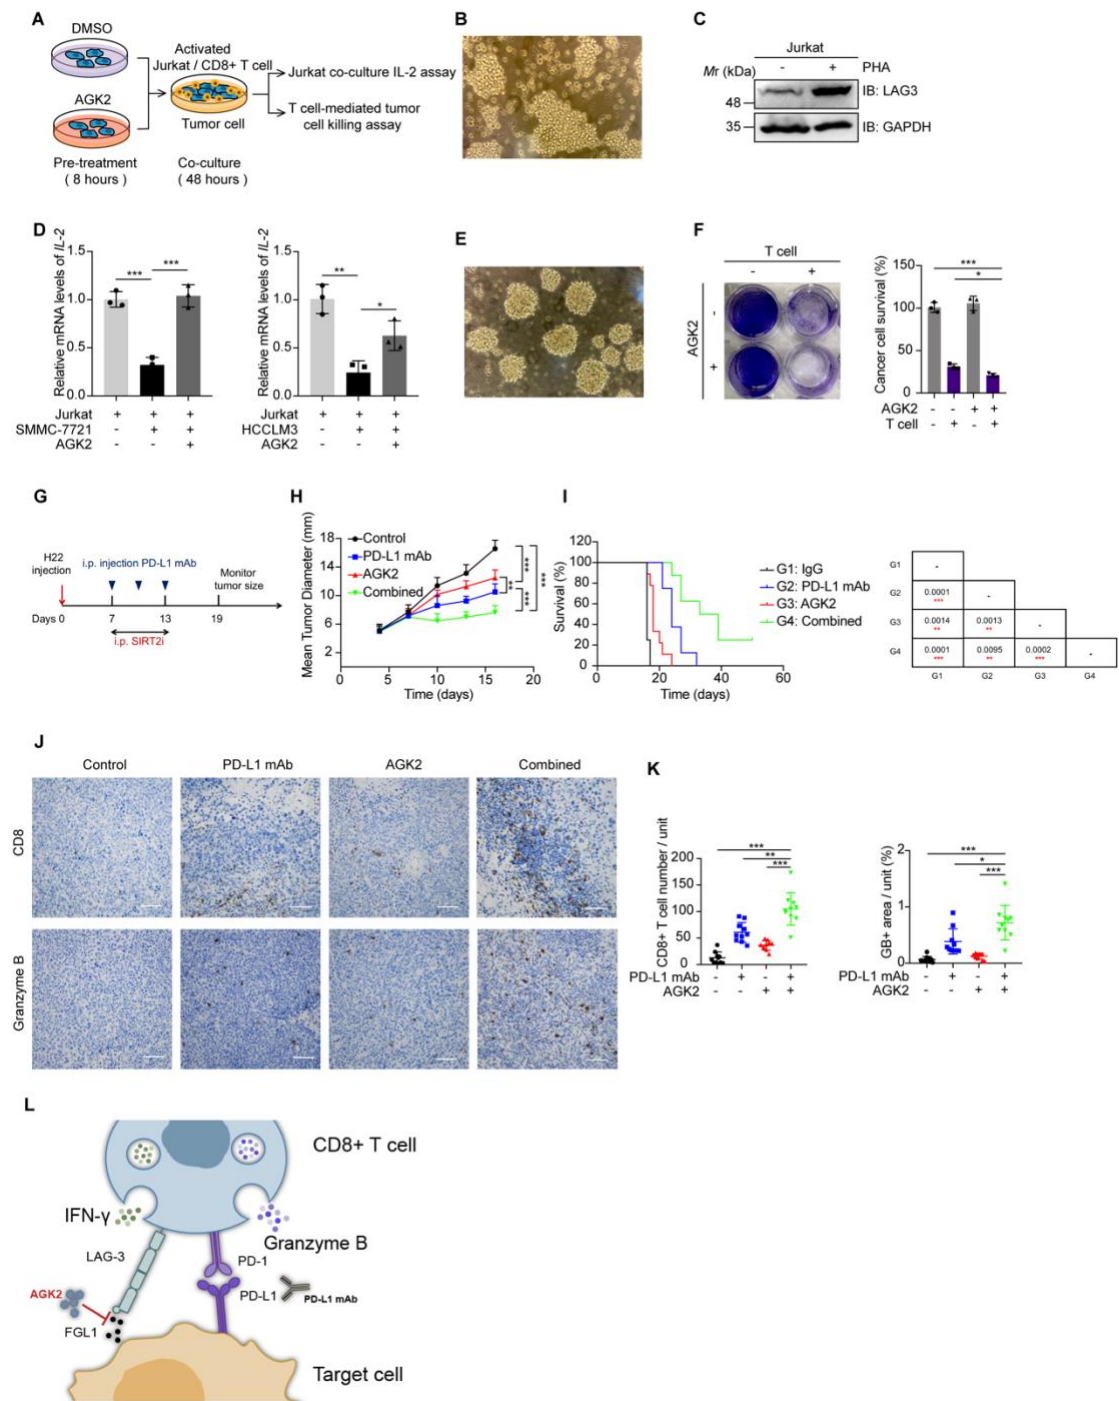

**Supplemental Figure 3. The combination of AGK2 and PD-L1 blockade effectively suppresses tumor growth of HCC. (A)** Schematic representation of established in vitro co-culture system. **(B)** Morphology of activated Jurkat T cells. **(C)** IB analysis of LAG3 level in Jurkat T cells stimulated with or without PHA (500 ng/mL, 48 h). **(D)** qPCR analysis of *IL-2* mRNA levels in Jurkat T cells co-cultured with or without AGK2 pretreated HCCLM3 or SMMC-7721 cells. Data are mean  $\pm$  S.D. of  $n = 3$

independent experiments. Statistical differences were determined by *t*-test. \*  $p < 0.05$ , \*\*  $p < 0.01$ , \*\*\*  $p < 0.001$ . (E) Morphology of activated human T cells. (F) Images of T cell-mediated cancer cell killing assay. HCCLM3 cells pretreated with AGK2 were co-cultured with activated T cell for 48 h. Crystal violet staining was used for quantification. Data are mean  $\pm$  S.D. of  $n = 3$  independent experiments. (G) Schematic representation of the experimental procedure. (H) Tumor growth of H22 murine hepatocarcinoma tumor cells in BALB/c mice treated with control (black lines;  $n=8$ ), AGK2 (red lines;  $n=9$ ), anti-PD-L1 mAb (blue lines;  $n=8$ ) or the combined therapy (green lines;  $n=8$ ). Tumor growth is shown as mean tumor diameter  $\pm$  S.D. (I) Kaplan–Meier survival curves for each treatment group (control,  $n=8$ ; PD-L1 mAb,  $n=8$ ; AGK2,  $n=9$ ; combined,  $n=8$ ). The *p* value was calculated using a two-sided Gehan–Breslow–Wilcoxon test. (J) Immunohistochemistry of CD8<sup>+</sup> T cell infiltration and granzyme B in the H22 tumor mass as indicated. Scale bars, 100  $\mu$ m. Data represent mean  $\pm$  S.D. from 5 independent samples of each group. (K) IHC results of (J) were quantified and the statistical differences were determined by Student's *t* test. ns, no significance, \*  $p < 0.05$ , \*\*  $p < 0.01$ , \*\*\*  $p < 0.001$ . (L) Schematic diagram showing how AGK2 enhances the immunotherapy response through decreasing FGL1 protein levels in HCC cell lines and blocking LAG-3/FGL1 pathway.

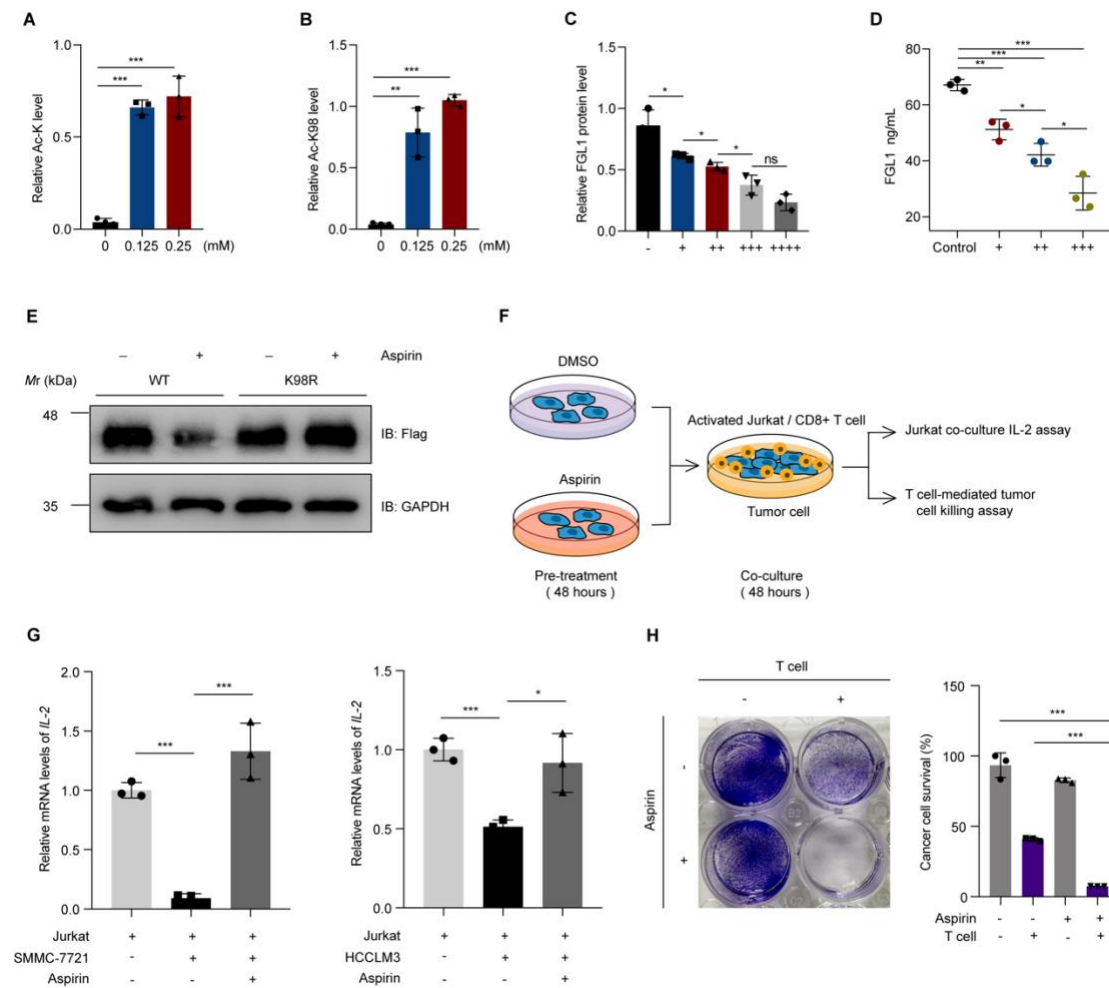

**Supplemental Figure 4. Aspirin acetylates FGL1 and promotes its degradation.** (A) Statistical analysis of immunoblots in Figure 4A determined by Student's t test. ns, no significance, \*  $p < 0.05$ , \*\*  $p < 0.01$ , \*\*\*  $p < 0.001$ . (B) Statistical analysis of immunoblots in Figure 4B determined by Student's t test. ns, no significance, \*  $p < 0.05$ , \*\*  $p < 0.01$ , \*\*\*  $p < 0.001$ . (C) Statistical analysis of immunoblots in Figure 4G determined by Student's t test. ns, no significance, \*  $p < 0.05$ , \*\*  $p < 0.01$ , \*\*\*  $p < 0.001$ . (D) Enzyme-linked immunoassay (ELISA) quantification of soluble FGL1 from HCCLM3 when treated with or without aspirin (+, 0.125mM; ++, 0.25mM; +++, 0.5mM) for 24h. Statistical differences were determined by t-test. \*  $p < 0.05$ , \*\*\*  $p < 0.001$ . 3 biological replicates were analyzed. (E) IB analysis of FGL1 protein level in HEK293T cells transfected with FGL1 WT or 98R mutant under treatment of aspirin (0.5mM, 24h). (F) Schematic representation of established in vitro co-culture system. (G) qPCR analysis

of *IL-2* mRNA level in stimulated Jurkat T cells co-cultured with control or aspirin pretreated HCCLM3 or SMMC-7721 cells. Data are mean  $\pm$  S.D. of n = 3 independent experiments. Statistical differences were determined by t-test. \* p < 0.05, \*\*\* p < 0.001. **(H)** Images of T cell-mediated cancer cell killing assay. HCCLM3 cells pretreated with aspirin were then co-cultured with activated T cell for 48 h. Crystal violet staining was used for quantification. Data are mean  $\pm$  S.D. of n = 3 independent experiments.

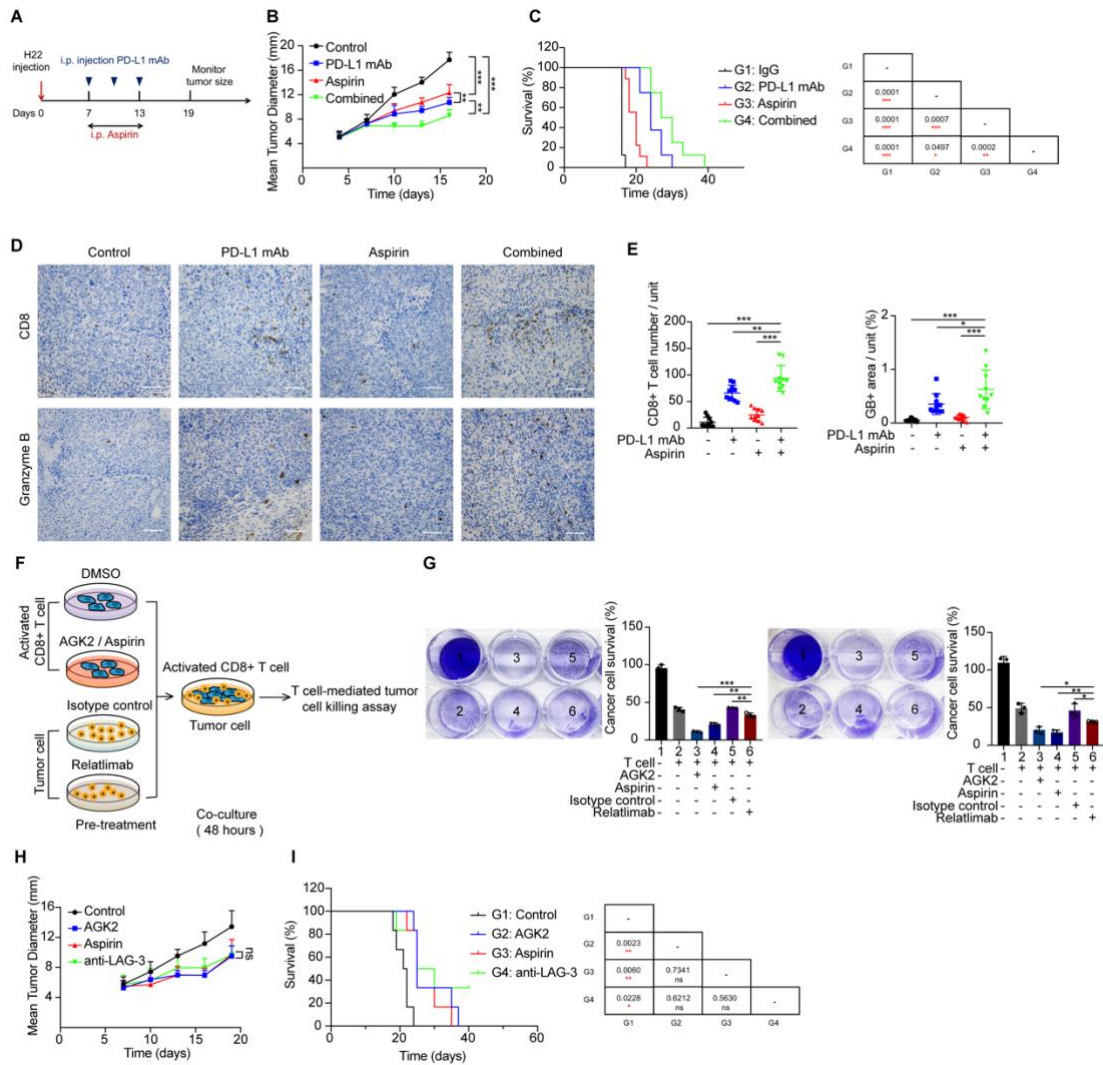

**Supplemental Figure 5. Aspirin downregulates FGL1 and enhances the efficacy of anti-PD-L1 immunotherapy.** (A) Schematic representation of the experimental procedure. (B) Tumor growth of H22 murine hepatocarcinoma tumor cells in BALB/c mice treated with control (black lines; n=8), aspirin (red lines; n=9), anti-PD-L1 mAb (blue lines; n=8) or the combined therapy (green lines; n=8). Tumor growth is shown as mean tumor diameter  $\pm$  S.D. (C) Kaplan–Meier survival curves for each treatment group (control, n= 8; PD-L1 mAb, n= 8; aspirin, n= 9; combined therapy, n= 8). The *p* value was calculated using a two-sided Gehan–Breslow–Wilcoxon test. (D) Immunohistochemistry of CD8<sup>+</sup> T cell infiltration and granzyme B in the H22 tumor mass as indicated. Scale bars, 100  $\mu$ m. Data represent mean  $\pm$  S.D. from 5 independent samples of each group. (E) IHC results of (E) were quantified and the statistical



differences were determined by Student's t test. ns, no significance, \*  $p < 0.05$ , \*\*  $p < 0.01$ , \*\*\*  $p < 0.001$ . **(F)** Schematic representation of established in vitro co-culture system. **(G)** Images of T cell-mediated cancer cell killing assay. HCCLM3 and SMMC-7721 cell lines pretreated with AGK2 or aspirin were co-cultured with activated T cell for 48 h. Activated T cell pretreated with Relatlimab were co-cultured with HCCLM3 and SMMC-7721 cell lines for 48 h. Crystal violet staining was used for quantification. Data are mean  $\pm$  S.D. of  $n = 3$  independent experiments. Statistical differences were determined by Student's t test. ns, no significance, \*  $p < 0.05$ , \*\*  $p < 0.01$ , \*\*\*  $p < 0.001$ . **(H)** Tumor growth of Hepa 1-6 cells in C57BL/6 mice treated with control (black lines), aspirin (red lines), AGK2 (blue lines) or the anti-LAG-3 mAb (green lines).  $n = 6$  biologically independent animals per group. Tumor growth is shown as mean tumor diameter  $\pm$  S.D. **(I)** Kaplan–Meier survival curves for each treatment group.  $n = 6$  biologically independent animals per group. The  $p$  value was calculated using a two-sided Gehan–Breslow–Wilcoxon test.

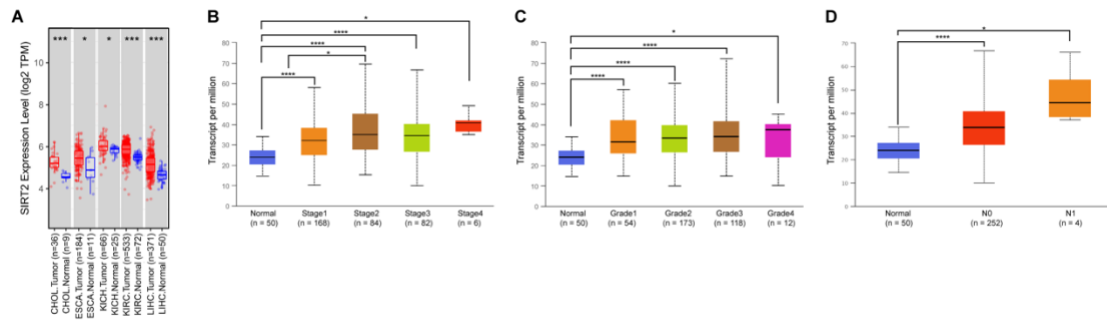

**Supplemental Figure 6. SIRT2 is upregulated while K98-Acetylation of FGL1 is downregulated**

**in hepatocellular carcinoma. (A)** The mRNA levels of SIRT2 derived from normal or tumor specimen

in various cancer types from TCGA database. Statistical differences were determined by Student's t test.

CHOL: Cholangiocarcinoma; ESCA: Esophageal carcinoma; KICH: Kidney Chromophobe; KIRC: Kidney

renal clear cell carcinoma; LIHC: Liver hepatocellular carcinoma. **(B-D)** SIRT2 expression analysis in HCC

based on tumor stages, grades and nodal metastasis status by UALCAN.

## Supplementary Tables

**Supplemental Table 1.**

| qPCR primers     |                              |                          |
|------------------|------------------------------|--------------------------|
|                  | Forward 5'-3'                | Reverse 5'-3'            |
| <b>hACTIN</b>    | TATTGGCAACGAGCGGTTCC         | GGCATAGAGGTCTTTACGGATGTC |
| <b>hGAPDH</b>    | GTCTCCTCTGACTTCAACAGCG       | ACCACCCTGTTGCTGTAGCCAA   |
| <b>hIL-2</b>     | GAATGGAATTAATAATTACAAGAATCCC | TGTTTCAGATCCCTTTAGTTCCAG |
| <b>hFGL1 1-1</b> | ATGGCAAAGGTGTTTCAGTTTCA      | ACAATCTGCATACTGCCTCTTG   |
| <b>hFGL1 1-2</b> | TATTGTGACATGTCCGATGGAGG      | TTCAGAGAATACCACCACCCATG  |
| <b>hFGL1 1-3</b> | CATTGATCTTGGAAGCAAGAGGC      | AGTTGTCATGATCTCTGTCCCAC  |

**Supplemental Table 2.**

| Antibodies used for immunoblot             |                           |            |
|--------------------------------------------|---------------------------|------------|
| Antibody                                   | Source                    | Cat Number |
| <b>FGL1</b>                                | Proteintech               | 16000-1-AP |
| <b>FGL1</b>                                | Abcam                     | ab170922   |
| <b>FGL2</b>                                | Proteintech               | 67152-1-Ig |
| <b>GAPDH</b>                               | Proteintech               | 60004-1-Ig |
| <b>Acetylated-lysine antibody</b>          | Cell Signaling Technology | #9441      |
| <b>LAG3</b>                                | Proteintech               | 16616-1-AP |
| <b>His-tag</b>                             | HUABIO                    | R1207-2    |
| <b>HA-tag</b>                              | AbHO                      | HOA012HA01 |
| <b>Flag-tag</b>                            | AbHO                      | HOA012FL01 |
| <b>Secondary anti-mouse</b>                | SAB                       | L3032      |
| <b>Secondary anti-rabbit</b>               | SAB                       | L3012      |
| <b>InVivoMAb rat IgG2a isotype control</b> | BioXcell                  | BE0089     |
| <b>InVivoMab anti-mouse PD-L1 (B7-H1)</b>  | BioXcell                  | BE0101     |
| <b>InVivoMAb rat IgG1 isotype control</b>  | BioXcell                  | BE0088     |
| <b>InVivoMAb anti-mouse LAG-3</b>          | BioXcell                  | BE0174     |

**Supplemental Table 3.**

| Antibodies used for IHC staining |                             |            |
|----------------------------------|-----------------------------|------------|
| Antibody                         | Source                      | Cat Number |
| <b>CD8<math>\alpha</math></b>    | Cell Signaling Technology   | 98941      |
| <b>Granzyme B</b>                | Abcam                       | ab255598   |
| <b>FGL1</b>                      | Abcam                       | ab275091   |
| <b>SIRT2</b>                     | Abcam                       | ab211033   |
| <b>Acetyl-K98-FGL1</b>           | ABclonal Technology Biotech | N/A        |

**Supplemental Table 4.**

| <b>The correlation of clinicopathological variables of the HCC patients and SIRT2 expression levels</b> |          |                         |             |                            |                |
|---------------------------------------------------------------------------------------------------------|----------|-------------------------|-------------|----------------------------|----------------|
| <b>Clinicopathological parameters</b>                                                                   | <b>n</b> | <b>SIRT2 expression</b> |             | <b><math>\chi^2</math></b> | <b>P value</b> |
|                                                                                                         |          | <b>Low</b>              | <b>High</b> |                            |                |
| <b>all</b>                                                                                              | 84       | 47                      | 37          |                            |                |
| <b>Age(year)</b>                                                                                        |          |                         |             | 1.097                      | 0.295          |
| <55                                                                                                     | 44       | 27                      | 17          |                            |                |
| $\geq$ 55                                                                                               | 40       | 20                      | 20          |                            |                |
| <b>Gender</b>                                                                                           |          |                         |             | 1.948                      | 0.163          |
| Male                                                                                                    | 75       | 40                      | 35          |                            |                |
| Female                                                                                                  | 9        | 7                       | 2           |                            |                |
| <b>Liver cirrhosis</b>                                                                                  |          |                         |             | 0.398                      | 0.528          |
| No                                                                                                      | 49       | 26                      | 23          |                            |                |
| Yes                                                                                                     | 35       | 21                      | 14          |                            |                |
| <b>Tumor size(cm)</b>                                                                                   |          |                         |             | 12.755                     | 0.000*         |
| $\leq$ 5                                                                                                | 34       | 27                      | 7           |                            |                |
| >5                                                                                                      | 50       | 20                      | 30          |                            |                |
| <b>TNM stage</b>                                                                                        |          |                         |             | 15.452                     | 0.000*         |
| I/II                                                                                                    | 43       | 33                      | 10          |                            |                |
| III/IV                                                                                                  | 41       | 14                      | 27          |                            |                |
| <b>Pathological grade</b>                                                                               |          |                         |             | 3.657                      | 0.454          |
| I/I-II                                                                                                  | 10       | 8                       | 2           |                            |                |
| II/II-III                                                                                               | 68       | 37                      | 31          |                            |                |
| III/III-IV                                                                                              | 6        | 2                       | 4           |                            |                |

<sup>a</sup> A chi-square test was used for comparing groups between low and high SIRT2 expression. \*, p<0.05 was considered significant.

**Supplemental Table 5.**

| <b>The correlation of clinicopathological variables of the HCC patients and FGL1 expression levels</b> |          |                        |             |                            |                |
|--------------------------------------------------------------------------------------------------------|----------|------------------------|-------------|----------------------------|----------------|
| <b>Clinicopathological parameters</b>                                                                  | <b>n</b> | <b>FGL1 expression</b> |             | <b><math>\chi^2</math></b> | <b>P value</b> |
|                                                                                                        |          | <b>Low</b>             | <b>High</b> |                            |                |
| <b>all</b>                                                                                             | 84       | 35                     | 49          |                            |                |
| <b>Age(year)</b>                                                                                       |          |                        |             | 1.859                      | 0.173          |
| <55                                                                                                    | 44       | 19                     | 25          |                            |                |
| ≥55                                                                                                    | 40       | 16                     | 24          |                            |                |
| <b>Gender</b>                                                                                          |          |                        |             | 2.592                      | 0.107          |
| Male                                                                                                   | 75       | 29                     | 46          |                            |                |
| Female                                                                                                 | 9        | 6                      | 3           |                            |                |
| <b>Liver cirrhosis</b>                                                                                 |          |                        |             | 3.931                      | 0.047*         |
| No                                                                                                     | 49       | 16                     | 33          |                            |                |
| Yes                                                                                                    | 35       | 19                     | 16          |                            |                |
| <b>Tumor size(cm)</b>                                                                                  |          |                        |             | 9.492                      | 0.002*         |
| ≤5                                                                                                     | 34       | 21                     | 13          |                            |                |
| >5                                                                                                     | 50       | 14                     | 36          |                            |                |
| <b>TNM stage</b>                                                                                       |          |                        |             | 7.254                      | 0.007*         |
| I/II                                                                                                   | 43       | 24                     | 19          |                            |                |
| III/IV                                                                                                 | 41       | 11                     | 30          |                            |                |
| <b>Pathological grade</b>                                                                              |          |                        |             | 4.727                      | 0.316          |
| I/I-II                                                                                                 | 10       | 4                      | 6           |                            |                |
| II/II-III                                                                                              | 68       | 31                     | 37          |                            |                |
| III/III-IV                                                                                             | 6        | 0                      | 6           |                            |                |

<sup>a</sup> A chi-square test was used for comparing groups between low and high SIRT2 expression. \*, p<0.05 was considered significant.

**Supplemental Table 6.**

| <b>The correlation of clinicopathological variables of the HCC patients and Ac-K98 / total FGL1 expression levels</b> |          |                            |             |                            |                |
|-----------------------------------------------------------------------------------------------------------------------|----------|----------------------------|-------------|----------------------------|----------------|
| <b>Clinicopathological parameters</b>                                                                                 | <b>n</b> | <b>Ac-K98 / total FGL1</b> |             | <b><math>\chi^2</math></b> | <b>P value</b> |
|                                                                                                                       |          | <b>Low</b>                 | <b>High</b> |                            |                |
| <b>all</b>                                                                                                            | 84       | 37                         | 47          |                            |                |
| <b>Age(year)</b>                                                                                                      |          |                            |             | 0.028                      | 0.867          |
| <55                                                                                                                   | 44       | 19                         | 25          |                            |                |
| $\geq$ 55                                                                                                             | 40       | 18                         | 22          |                            |                |
| <b>Gender</b>                                                                                                         |          |                            |             | 1.948                      | 0.163          |
| Male                                                                                                                  | 75       | 35                         | 40          |                            |                |
| Female                                                                                                                | 9        | 2                          | 7           |                            |                |
| <b>Liver cirrhosis</b>                                                                                                |          |                            |             | 1.160                      | 0.281          |
| No                                                                                                                    | 49       | 24                         | 25          |                            |                |
| Yes                                                                                                                   | 35       | 13                         | 22          |                            |                |
| <b>Tumor size(cm)</b>                                                                                                 |          |                            |             | 9.757                      | 0.002*         |
| $\leq$ 5                                                                                                              | 34       | 8                          | 26          |                            |                |
| >5                                                                                                                    | 50       | 29                         | 21          |                            |                |
| <b>TNM stage</b>                                                                                                      |          |                            |             | 12.189                     | 0.000*         |
| I/II                                                                                                                  | 43       | 11                         | 32          |                            |                |
| III/IV                                                                                                                | 41       | 26                         | 15          |                            |                |
| <b>Pathological grade</b>                                                                                             |          |                            |             | 6.103                      | 0.047*         |
| I/I-II                                                                                                                | 10       | 2                          | 8           |                            |                |
| II/II-III                                                                                                             | 68       | 30                         | 38          |                            |                |
| III/III-IV                                                                                                            | 6        | 5                          | 1           |                            |                |

<sup>a</sup> A chi-square test was used for comparing groups between low and high SIRT2 expression. \*, p<0.05 was considered significant.

**Supplemental Table 7.**

| <b>The analysis of prognosis makers of HCC</b> |          |                            |                 |                |                              |                 |                |
|------------------------------------------------|----------|----------------------------|-----------------|----------------|------------------------------|-----------------|----------------|
| <b>Variables</b>                               | <b>n</b> | <b>Univariate analyses</b> |                 |                | <b>Multivariate analyses</b> |                 |                |
|                                                |          | <b>HR</b>                  | <b>(95% CI)</b> | <b>P value</b> | <b>HR</b>                    | <b>(95% CI)</b> | <b>P value</b> |
| <b>Age(year)</b>                               |          |                            |                 | 0.627          |                              |                 | 0.329          |
| <55                                            | 44       |                            |                 |                |                              |                 |                |
| ≥55                                            | 40       | 0.873                      | 0.505-1.508     |                | 0.739                        | 0.403-1.355     |                |
| <b>Gender</b>                                  |          |                            |                 | 0.360          |                              |                 | 0.779          |
| Male                                           | 75       |                            |                 |                |                              |                 |                |
| Female                                         | 9        | 1.611                      | 0.579-4.476     |                | 1.176                        | 0.377-3.661     |                |
| <b>Liver cirrhosis</b>                         |          |                            |                 |                |                              |                 | 0.046*         |
| No                                             | 49       |                            |                 | 0.613          |                              |                 |                |
| Yes                                            | 35       | 1.152                      | 0.665-1.993     |                | 1.802                        | 1.011-3.211     |                |
| <b>Tumor size(cm)</b>                          |          |                            |                 | 0.015*         |                              |                 | 0.236          |
| ≤5                                             | 34       |                            |                 |                |                              |                 |                |
| >5                                             | 50       | 2.088                      | 1.151-3.786     |                | 0.499                        | 0.158-1.573     |                |
| <b>TNM stage</b>                               |          |                            |                 | 0.000*         |                              |                 | 0.060          |
| I/II                                           | 43       |                            |                 |                |                              |                 |                |
| III/IV                                         | 41       | 3.068                      | 1.706-5.517     |                | 2.755                        | 0.957-7.930     |                |
| <b>Pathological grade</b>                      |          |                            |                 | 0.051          |                              |                 | 0.333          |
| I/I-II                                         | 10       |                            |                 |                |                              |                 |                |
| II/II-III                                      | 68       |                            |                 |                |                              |                 |                |
| III/III-IV                                     | 6        | 1.933                      | 0.997-3.746     |                | 1.422                        | 0.696-2.904     |                |
| <b>SIRT2</b>                                   |          |                            |                 | 0.000*         |                              |                 | 0.014*         |
| Low                                            | 47       |                            |                 |                |                              |                 |                |
| High                                           | 37       | 5.194                      | 2.824-9.550     |                | 2.642                        | 1.215-5.742     |                |
| <b>FGL1</b>                                    |          |                            |                 | 0.000*         |                              |                 | 0.045*         |
| Low                                            | 35       |                            |                 |                |                              |                 |                |
| High                                           | 49       | 3.688                      | 1.935-7.026     |                | 2.187                        | 1.018-4.699     |                |
| <b>Ac-K98 / total FGL1</b>                     |          |                            |                 | 0.000*         |                              |                 | 0.006*         |
| Low                                            | 37       |                            |                 |                |                              |                 |                |
| High                                           | 47       | 0.182                      | 0.099-0.333     |                | 0.366                        | 0.179-0.750     |                |

**Abbreviations:** 95% CI, 95% confidence interval; HR, hazard ratio. \*, p<0.05 was regarded as statistically significant, p value was calculated using Cox's proportional hazards regression.
